# Supplementary material for: The intracellular bacterium Anaplasma phagocytophilum selectively manipulates the levels of vertebrate host proteins in the tick vector Ixodes scapularis
Source: PubMed Central journal article supplement (PMC5000436; doi:10.1186/s13071-016-1747-3), 2016-08-25
Supplement: 13071_2016_1747_MOESM2_ESM.pdf [file 13071_2016_1747_MOESM2_ESM.pdf]

## Supplemental Material

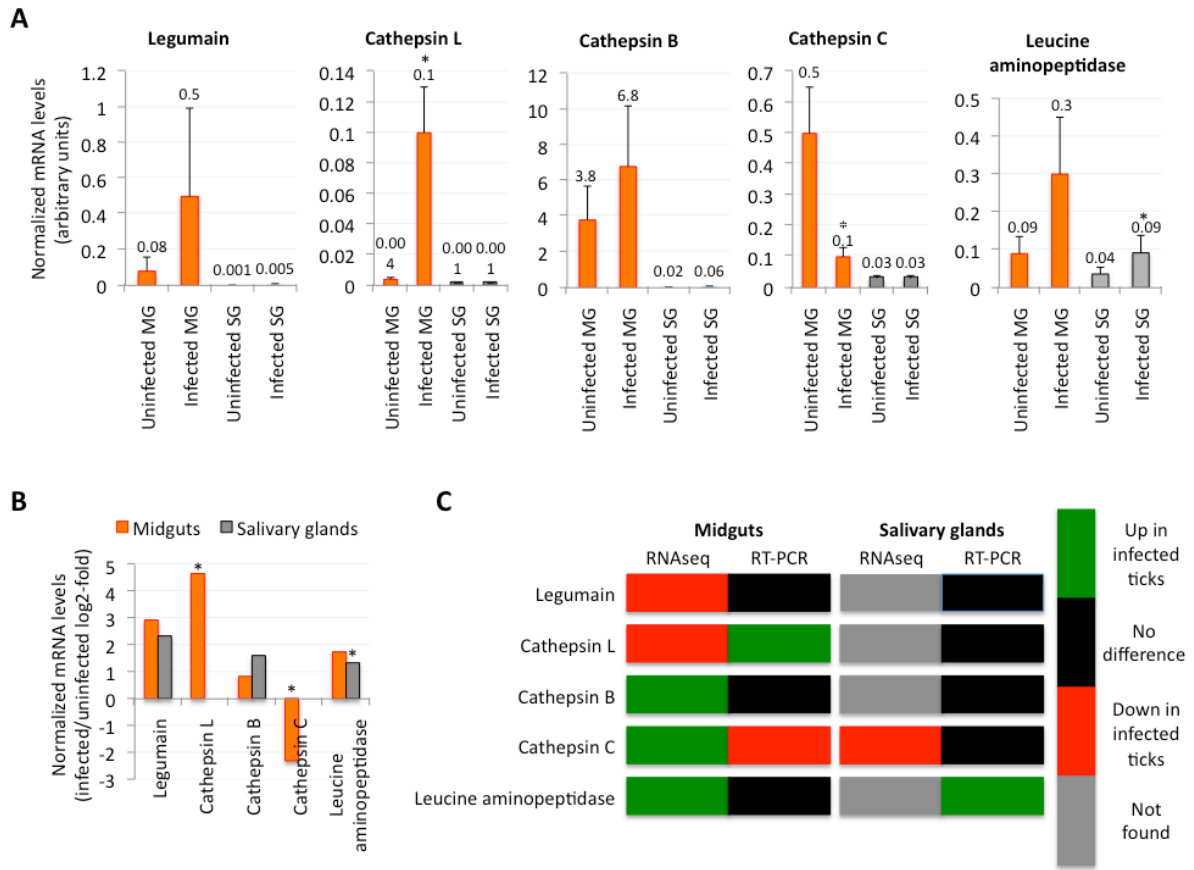

**Figure S1. Analysis of RNAseq results by real-time RT-PCR.** Five selected genes coding for hemoglobin digesting enzymes Legumain (ISCW015983), Cathepsin L (ISCW000076), Cathepsin B (ISCW000080), Cathepsin C (ISCW003494) and Leucine aminopeptidase (ISCW001779) differentially regulated in response to *A. phagocytophilum* infection were used for analysis by real-time RT-PCR in individual tick midguts and salivary glands. (A) The mRNA levels were normalized against tick 16S rRNA and cyclophilin, represented as Ave+SD and compared between infected and uninfected ticks by Student's t-test with unequal variance ( $*P \leq 0.05$ ; N=3-17 biological replicates). (B) Normalized mRNA levels are represented as infected/uninfected Log<sub>2</sub>-fold ratio and compared between infected and uninfected ticks by Student's t-test with unequal variance ( $*P \leq 0.05$ ). (C) Differential expression of selected tick genes was compared between RNAseq and real-time RT-PCR results in midguts and salivary glands.

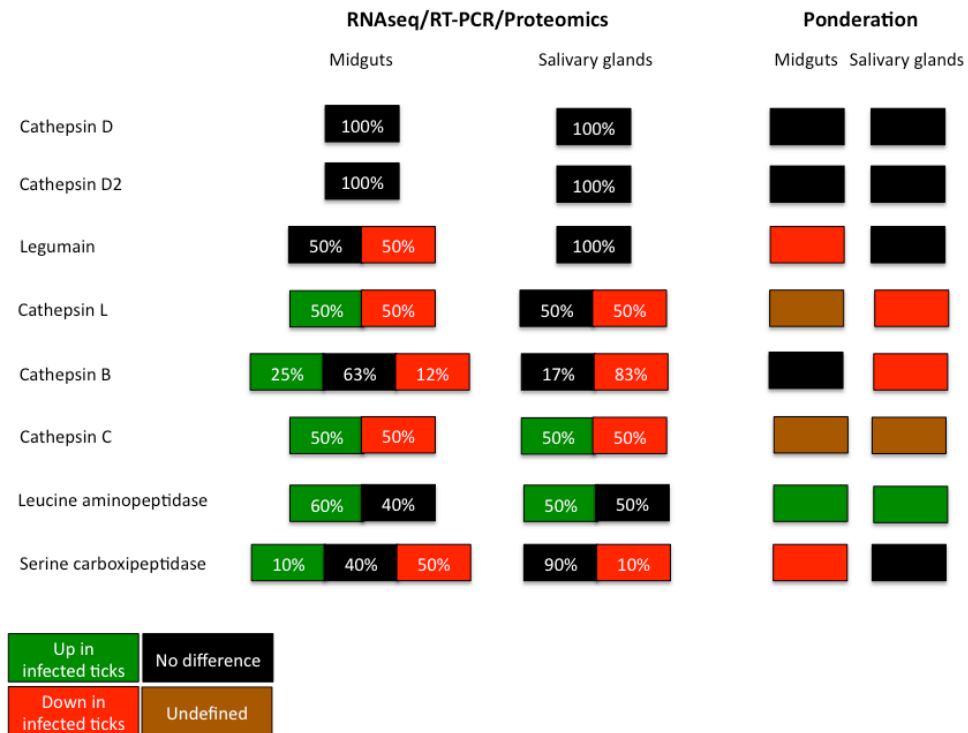

**Figure S2. Pondering mRNA and protein data.** Transcriptomics RNAseq data (Ayllón et al. 2015), real-time RT-PCR results obtained in this study and proteomics data (Ayllón et al. 2015) were considered when pondering the effect of *A. phagocytophilum* infection in the gene expression/protein representation of tick hemoglobinolytic enzymes in midguts and salivary glands. The results are shown as percent of genes/proteins for each enzyme that were up, down or without differences between infected and uninfected ticks. The final ponderation was made considering that 50% or more of the enzymes were up or down in response to infection. Otherwise, enzymes were considered that did not change or their levels could not be defined in response to infection.

**Table S1.** Genes and oligonucleotide primers selected for expression analysis by real-time RT-PCR.

| <i>I.scapularis</i> genes | Genbank accession No. | Forward and Reverse primers for RTPCR (5' - 3')         | PCR annealing conditions |
|---------------------------|-----------------------|---------------------------------------------------------|--------------------------|
| Cathepsin B               | ISCW000080            | GGCAGGAAGGAACTTCGACA<br>CTGGTCGCGGATAAGGTGAA            | 60°C/30s                 |
| Cathepsin C               | ISCW003494            | CGAAAGACGTTTCGATGCGAC<br>CACCTCGAAGCCCTGATTGT           | 60°C/30s                 |
| Cathepsin L               | ISCW000076            | CAGCGAAGGAAAGGTCCAGGT<br>TTACCCGTAACCGCAGGAATGG         | 63°C/30s                 |
| Legumain                  | ISCW015983            | CCCCGGAGAACTTCCTGAAC<br>CTTGCCGAACCTGTTTTCCG            | 60°C/30s                 |
| Leucine aminopeptidase    | ISCW001779            | ATGCAGACTTCGTCCTCACG<br>CTCATCGCGGTCTTCCAGTT            | 60°C/30s                 |
| Cyclophilin               | ISCW000776            | GCTTCGGTTACAAGGGCAGCAGCATTT<br>TCGGGTGTGCTTCAGGATGAAGTT | 60°C/30s                 |
| Ribosomal protein S4      | DQ066214              | GGTGAAGAAGATTGTCAAGCAGAG<br>TGAAGCCAGCAGGGTAGTTTG       | 60°C/30s                 |

**Table S2.** Differential expression of highly differentially regulated tick protease genes in response to *A. phagocytophilum* infection.

| ID                                         | Description                            | Log2 (infected/uninfected)<br>fold change (mRNA) |
|--------------------------------------------|----------------------------------------|--------------------------------------------------|
| <b>Peptidases in tick midguts</b>          |                                        |                                                  |
| ISCW004264                                 | Carboxypeptidase*                      | +3.2                                             |
| ISCW020713                                 | Aminopeptidase                         | +2.8                                             |
| ISCW003960                                 | Dipeptidylpeptidase                    | +2.6                                             |
| ISCW022741                                 | Polylycarboxypeptidase*                | -7.4                                             |
| ISCW022742                                 | Polylycarboxypeptidase                 | -6.0                                             |
| ISCW022743                                 | Polylycarboxypeptidase                 | -4.0                                             |
| <b>Peptidases in tick salivary glands</b>  |                                        |                                                  |
| ISCW022411                                 | Glutamate carboxypeptidase             | +3.9                                             |
| ISCW007964                                 | Carboxypeptidase                       | +2.9                                             |
| ISCW001311                                 | Carboxypeptidase                       | +1.6                                             |
| ISCW022741                                 | Polylycarboxypeptidase*                | -6.3                                             |
| ISCW004264                                 | Carboxypeptidase*                      | -2.7                                             |
| ISCW020703                                 | Signal peptidase complex subunit SPC25 | -2.1                                             |
| <b>Proteases in tick midguts</b>           |                                        |                                                  |
| ISCW003013                                 | Sentrin/sumo-specific protease         | +4.8                                             |
| ISCW011212                                 | Ubiquitin-specific protease            | +3.0                                             |
| ISCW001119                                 | Serine protease                        | +2.8                                             |
| ISCW001619                                 | Serine protease                        | -3.8                                             |
| ISCW014841                                 | Secreted serine protease               | -3.8                                             |
| ISCW012429                                 | Serine protease                        | -3.5                                             |
| <b>Proteases in tick salivary glands</b>   |                                        |                                                  |
| ISCW013599                                 | Salivary metalloprotease               | +3.5                                             |
| ISCW007161                                 | Metalloendopeptidase                   | +2.8                                             |
| ISCW019965                                 | Ubiquitin-specific protease            | +2.2                                             |
| ISCW003039                                 | Caspase, apoptotic cysteine protease   | -4.8                                             |
| ISCW006994                                 | Metalloprotease                        | -2.0                                             |
| ISCW016405                                 | Metalloendopeptidase                   | -1.4                                             |
| <b>Proteinases in tick midguts</b>         |                                        |                                                  |
| ISCW001423                                 | Zinc metalloproteinase                 | +4.0                                             |
| ISCW007768                                 | Serine proteinase                      | +2.8                                             |
| ISCW014005                                 | Serine proteinase                      | +2.3                                             |
| ISCW006136                                 | Matrix metalloproteinase               | -2.9                                             |
| ISCW015172                                 | Serine proteinase                      | -2.5                                             |
| ISCW012738                                 | Midgut serine proteinase 1             | -2.0                                             |
| <b>Proteinases in tick salivary glands</b> |                                        |                                                  |
| ISCW007716                                 | Ubiquitin-specific proteinase          | +3.4                                             |

Proteases included in the analysis correspond to the genes annotated in the *I. scapularis* genome as “peptidase”, “protease” or “proteinase” that are different from the hemoglobinolytic enzymes. The three genes up-regulated and down-regulated with the highest fold change in response to *A. phagocytophilum* infection in tick midguts and salivary glands were selected on each protease category. Transcriptomics RNAseq data

from *A. phagocytophilum*-infected and uninfected tick samples were obtained from Ayllón et al. (2015). Only genes with statistically significant differences were included. Abbreviations: ID, gene (GenBank; <http://www.ncbi.nlm.nih.gov>) accession numbers; +, up-regulated genes in infected vs. uninfected ticks; -, down-regulated genes in infected vs. uninfected ticks; \*Genes that appeared in both tick midguts and salivary glands.

**Table S3. Percent homology for selected differentially represented host proteins.**

| Hosts <sup>1</sup>             | Midguts          |                 |       |       |       |       | Salivary glands |       |
|--------------------------------|------------------|-----------------|-------|-------|-------|-------|-----------------|-------|
|                                | HMG <sup>2</sup> | SA8             | SA12  | SERP  | H2B   | AP-1  | TOPO1           | IgHC  |
| <i>Ovis aries</i> <sup>3</sup> | -                | -               | -     | -     | -     | -     | -               | -     |
| <i>Homo sapiens</i>            | 86.62            | 71.59           | 65.22 | 62.82 | 100   | 99.68 | 96.73           | 59.52 |
| <i>Equus caballus</i>          | 88.03            | 84.27           | 77.17 | 70.51 | 100   | 99.58 | 97.07           | 64.19 |
| <i>Bos taurus</i>              | 90.85            | 92.13           | 83.70 | 85.90 | 100   | 99.68 | 98.17           | 85.30 |
| <i>Canis lupus familiaris</i>  | 80.99            | 80.90           | 67.39 | 70.36 | 100   | 99.79 | 97.00           | 58.78 |
| Cervidae                       | 82.98            | NF <sup>4</sup> | NF    | NF    | NF    | 91.67 | NF              | 40.85 |
| Peromyscus                     | 83.80            | 65.17           | 42.39 | 60.67 | 100   | 99.79 | 97.11           | 44.51 |
| Microtus                       | 82.39            | 61.80           | 42.39 | 60.41 | 100   | 99.47 | 95.95           | NF    |
| Tamias                         | 82.39            | NF              | NF    | 32.61 | NF    | NF    | NF              | NF    |
| Procyon                        | 82.27            | NF              | NF    | NF    | NF    | NF    | NF              | NF    |
| Passeriformes                  | 70.42            | 35.96           | 46.74 | 45.64 | 96.03 | 98.53 | 92.15           | 33.66 |

The most over-represented and under-represented sheep host proteins in *A. phagocytophilum*-infected *I. scapularis* midguts (fold change > 9, log<sub>2</sub>-fold >3.2 or <-3.2) and salivary glands (fold change > 6.5, log<sub>2</sub>-fold >2.7 or <-2.7) when compared to uninfected controls were selected for analysis.

<sup>1</sup>Hosts were selected based on their role as natural hosts for *A. phagocytophilum* and *I. scapularis* or for suffering granulocytic anaplasmosis after infection with *A. phagocytophilum* transmitted by *I. scapularis*. Hosts are represented at the order (Passeriformes/bird) family (Cervidae/deer), genus (Peromyscus/deer mice, Microtus/voles, Tamias/chipmunk and Procyon/raccoon) and species (*Ovis aries*/sheep, *Homo sapiens*/man, *Equus caballus*/horse, *Bos taurus*/caw and *Canis lupus familiaris*/dog) levels.

<sup>2</sup>Protein names were abbreviated as HMG (Hemoglobin subunit alpha; P21379), SA8 (S100 calcium-binding protein A8; W5N9K9), SA12 (S100 calcium-, zinc- and copper-binding protein A12; W5N9J0), SERP (Serpine-like protein; W5P9M9), H2B (Histone H2B; P62808), AP-1 (Clathrin-associated adaptor protein complex 1 (AP-1) subunit beta-1; Q08DS7), TOPO1 (Topoisomerase I; F1MN93) and IgHC (Ig heavy chain; G5E5T5).

<sup>3</sup>Percent of protein identity was calculated using Clustal2.1 and taking *Ovis aries* homologs as reference.

<sup>4</sup>NF: No homolog was found using BLAST at <http://www.ncbi.nlm.nih.gov>.

**Methods for the determination of protein homology for selected sequences.** Major domestic and wild vertebrate hosts for *I. scapularis* that have been reported to be infected with *A. phagocytophilum* were obtained from previous publications (Keesing et al. 2012; Stuen et al. 2013; Dugat et al. 2015; Kocan et al. 2015; de la Fuente et al. 2015; Estrada-Peña et al. 2015). Four major domestic hosts were identified: *Ovis aries* (Oar), *Equus caballus* (Eca), *Canis lupus familiaris* (Clf) and *Bos taurus* (Bta) (Kocan et al. 2015). Wild hosts were identified belonging to the order Passeriformes (Keesing et al. 2012), the family Cervidae and the genera *Peromyscus*, *Microtus*, *Tamias* and *Procyon* (Stuen et al. 2013; Dugat et al. 2015). *Homo sapiens* (Hsa) was also included in the analysis as an accidental host for *I. scapularis* that can be infected by *A. phagocytophilum* causing HGA (Kocan et al.

2015). The most over-represented and under-represented sheep host proteins in *A. phagocytophilum*-infected *I. scapularis* midguts (fold change > 9, log<sub>2</sub>-fold >3.2 or <-3.2) and salivary glands (fold change > 6.5, log<sub>2</sub>-fold >2.7 or <-2.7 (see Dataset S1 in the supplemental material) when compared to uninfected controls were selected for analysis. Protein sequences from hemoglobin subunit alpha (HMG), S100 calcium-binding protein A8 (SA8), S100 calcium-, zinc- and copper-binding protein A12 (SA12), Serpin (SERP), histone H2B (H2B), clathrin-associated adaptor protein complex 1 (AP-1) subunit beta-1 (AP-1), topoisomerase I (TOPO1) and immunoglobulin heavy chain (IgHC) of *O. aries* were obtained from GenBank (<http://www.ncbi.nlm.nih.gov>). Homolog search of the above proteins was performed against the GenBank databases: *Equus caballus* (taxid: 9796), *Canis lupus familiaris* (taxid: 9615), *Bos taurus* (taxid: 9913), Passeriformes (taxid: 9126), Cervidae (taxid: 9850), *Peromyscus* (taxid: 10040), *Microtus* (taxid: 10053), *Tamias* (taxid: 13712) and *Procyon* (taxid: 9653) using Protein-Protein Basic Local Alignment Search Tool (BLASTP) from BLAST (Altschul et al. 1990; Madden et al. 1996) and *O. aries* sequences as “queries”. The sequences with the lowest E-value were selected for further analysis. Accession numbers of protein sequences identified using the above procedure were HMG (Oar, CAA49750; Eca, CAA30097; Clf, NP\_001257814; Bta, CAB56829; Cervidae, P01972; *Peromyscus*, ABN71080; *Microtus*, XP\_005349096; *Tamias*, AGU68546; *Procyon*, P18977; Passeriformes, ALG03085 and Hsa, ABF56145), SA8 (Oar, XP\_004002572; Eca, XP\_001493639; Clf, NP\_001139616; Bta, NP\_001107197; *Peromyscus*, XP\_006976290; *Microtus*, XP\_005367318; Passeriformes, XP\_008926848 and Hsa, NP\_001306126), SA12 (Oar, XP\_004002571; Eca, XP\_001494448; Clf, XP\_003434953; Bta, ACJ06402; *Peromyscus*, XP\_006992615; *Microtus*, XP\_005360276; Passeriformes, XP\_014129499 and Hsa, NP\_005612), SERP (Oar, XP\_004020624; Eca, XP\_014583359; Clf, XP\_541074; Bta, NP\_001193642; *Peromyscus*, XP\_006993755; *Microtus*, XP\_005368788; *Tamias*, BAD06478; Passeriformes, XP\_005481730 and Hsa, AAQ04218), H2B (Oar, XP\_004019078; Eca, XP\_001497452; Clf, XP\_545389; Bta, NP\_001032546; *Peromyscus*, XP\_006988912; *Microtus*, XP\_005354996; Passeriformes, XP\_002192965 and Hsa, NP\_003509), AP-1 (Oar, XP\_004012503; Eca, XP\_001503974; Clf, XP\_853723; Bta, NP\_001068593; Cervidae, AAD41905; *Peromyscus*, XP\_006995370; *Microtus*, XP\_005349419; Passeriformes, XP\_005495081 and Hsa, BAF82217), TOPO1 (Oar, XP\_011974341; Eca, XP\_005604687; Clf, XP\_534420; Bta, NP\_001193416; *Peromyscus*, XP\_006971113; *Microtus*, XP\_005363050; Passeriformes, XP\_005490040 and Has, NP\_003277) and IgHC (Oar, S25705; Eca, AAU09792; Clf, P01874; Bta, AAN60017; Cervidae, ABO16483; *Peromyscus*, AAR21580; Passeriformes, XP\_014117986 and Has, AAS01770). Percent identity matrices were generated for each group of homologs using Clustal 2.1 implemented in Clustal Omega (Sievers et al. 2011). Only pairwise comparisons including *O. aries* sequences were considered (Table 1).

## References

- Altschul SF, Gish W, Miller W, Myers EW, Lipman DJ. 1990. Basic local alignment search tool. *J Mol Biol* 215:403-410.
- de la Fuente J, Estrada-Peña A, Cabezas-Cruz A, Brey R. 2015. Flying ticks: anciently evolved associations that constitute a risk of infectious disease spread. *Parasit Vectors* 8:538.

- Dugat T, Lagrée AC, Maillard R, Boulouis HJ, Haddad N. 2015. Opening the black box of *Anaplasma phagocytophilum* diversity: current situation and future perspectives. *Front Cell Infect Microbiol* 5:61.
- Estrada-Peña A, de la Fuente J, Ostfeld RS, Cabezas-Cruz A. 2015. Interactions between tick and transmitted pathogens evolved to minimise competition through nested and coherent networks. *Sci Rep* 5:10361.
- Keesing F, Hersh MH, Tibbetts M, McHenry DJ, Duerr S, Brunner J, Killilea M, LoGiudice K, Schmidt KA, Ostfeld RS. 2012. Reservoir competence of vertebrate hosts for *Anaplasma phagocytophilum*. *Emerg Infect Dis* 18:2013-2016.
- Kocan KM, de la Fuente J, Cabezas-Cruz A. 2015. The genus *Anaplasma*: new challenges after reclassification. *Rev Sci Tech* 34:577-786.
- Madden TL, Tatusov RL, Zhang J. 1996. Applications of network BLAST server. *Methods Enzymol* 266:131-141.
- Sievers F, Wilm A, Dineen D, Gibson TJ, Karplus K, Li W, Lopez R, McWilliam H, Remmert M, Söding J, Thompson JD, Higgins DG. 2011. Fast, scalable generation of high-quality protein multiple sequence alignments using Clustal Omega. *Mol Syst Biol* 7:539.
- Stuen S, Granquist EG, Silaghi C. 2013. *Anaplasma phagocytophilum*--a widespread multi-host pathogen with highly adaptive strategies. *Front Cell Infect Microbiol* 3:31.
